# Supplementary material
Source: ML conference proceedings conference paper supplement (https://www.ecva.net/papers/eccv_2024/papers_ECCV/html/5518_ECCV_2024_paper.php)
Supplement: Supplementary file 1 [file 05518-supp.pdf]

## A Experiments on Fine-Grained Classification Datasets

In this section we present experiments on four fine-grained image classification datasets, where the goal is to estimate the number of categories — **Caltech-UCSD Birds** (CUB) [57] consists of 11,788 images of 200 bird species, **Stanford Cars** [29] contains 16,185 images of 196 car models, **FGVC Aircraft** [36] comprises 10,000 images of 100 aircraft models, and **Oxford Flowers** [39] includes 8,189 images of 102 flower categories. Although the names of categories are known, we use the same pairwise setting as the Re-ID tasks.

### A.1 Performance of Estimating $k$

Here we show the estimated  $k$  as a function of the number of sampled pairs, as with the Re-ID datasets in Fig. 4. Similarly to Re-ID tasks, our method outperforms all the baselines when using feature embeddings from an ImageNet-pretrained ResNet50, DINO ViT-B/8, and CLIP ViT-L/14. We calculate the similarity as described in § 4.

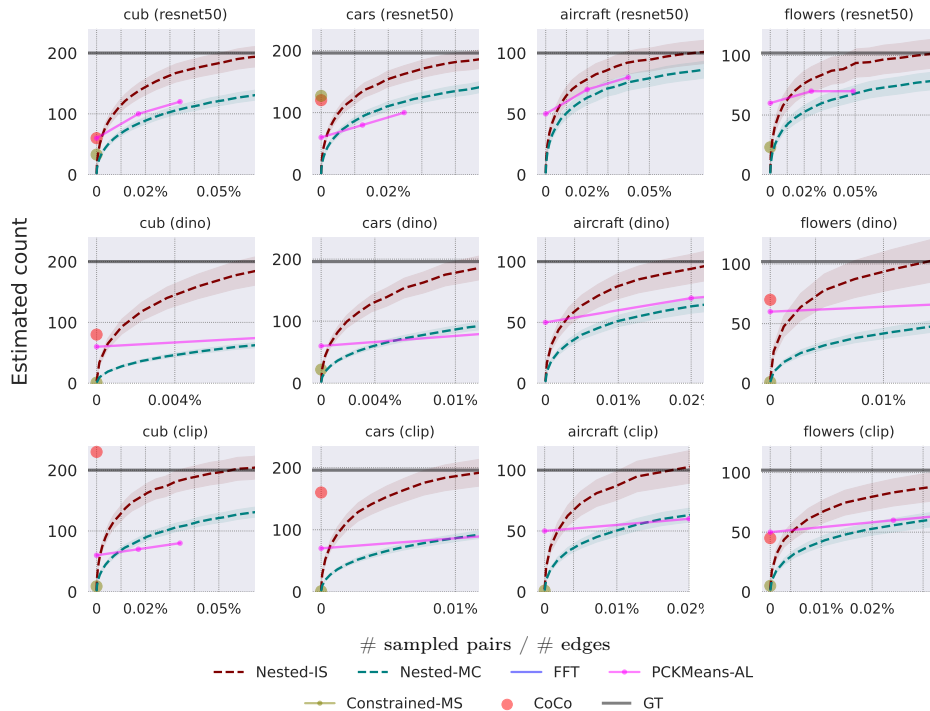

**Fig. A1: Performance of Estimating  $k$  per Human Effort** across fine-grained classification datasets. We use the cosine similarity built from ImageNet pretrained ResNet50, DINO ViT-B/8, and CLIP ViT-L/14 image embeddings. The human effort is measured as the fraction of the sampled pairs and total pairs  $|E|$  in the dataset  $G$ . Our method estimates the true count with less human effort compared to the other baselines. Dashed lines indicate the mean estimates and shaded regions indicate the mean 95% confidence interval across 100 trials.

## A.2 Measuring Clustering Accuracy

Similarly to the Re-ID datasets (See Fig. 8), we find that accurately estimating  $k$  has a bigger impact on the quality of clustering than active clustering, which suggests that human effort is better spent to estimate  $k$  initially.

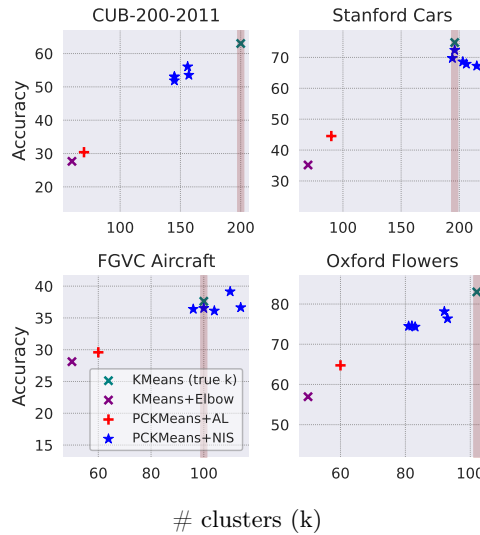

**Fig. A2: Clustering accuracy on fine-grained classification datasets** using the right number of clusters. Using the improved  $k$  and pairwise constraints (pck-means+AL) improves the clustering accuracy over  $k$ -means+elbow, while clustering accuracy with our estimated  $k$  improves accuracy further (pck-means+NIS). We plot results with five estimated  $k$ s and constraints from our proposed approach (blue stars). The red shaded line indicates the true number of clusters in the dataset.
